# Supplementary material
Source: PubMed Central journal article supplement (PMC7340358)
Supplement: NIHMS1588800-supplement-Appendix.pdf [file NIHMS1588800-supplement-Appendix.pdf]

Online Appendix, Hoot and Aronsky: Data Extraction Form

#: \_\_\_\_\_ Author: \_\_\_\_\_ Year: \_\_\_\_\_

Quality: \_\_\_\_\_ Reason: \_\_\_\_\_

Design: \_\_\_\_\_

\_\_\_\_\_

Institution: \_\_\_\_\_

Volume: \_\_\_\_\_ Acuity System: \_\_\_\_\_ Trauma Level: \_\_\_\_\_

Population: \_\_\_\_\_

\_\_\_\_\_

Sample: \_\_\_\_\_

\_\_\_\_\_

Endpoint: \_\_\_\_\_

\_\_\_\_\_

Analysis: \_\_\_\_\_

\_\_\_\_\_

Causes: \_\_\_\_\_

\_\_\_\_\_

Effects: \_\_\_\_\_

\_\_\_\_\_

Solutions: \_\_\_\_\_

\_\_\_\_\_

Notes: \_\_\_\_\_

\_\_\_\_\_

\_\_\_\_\_

\_\_\_\_\_

\_\_\_\_\_
